# Supplementary figures and images for: Photomorphogenesis of leaves: shade-avoidance and differentiation of sun and shade leaves
Source: Royal Society of Chemistry journal article supplement (doi:10.1039/b418440h), 2005-05-04

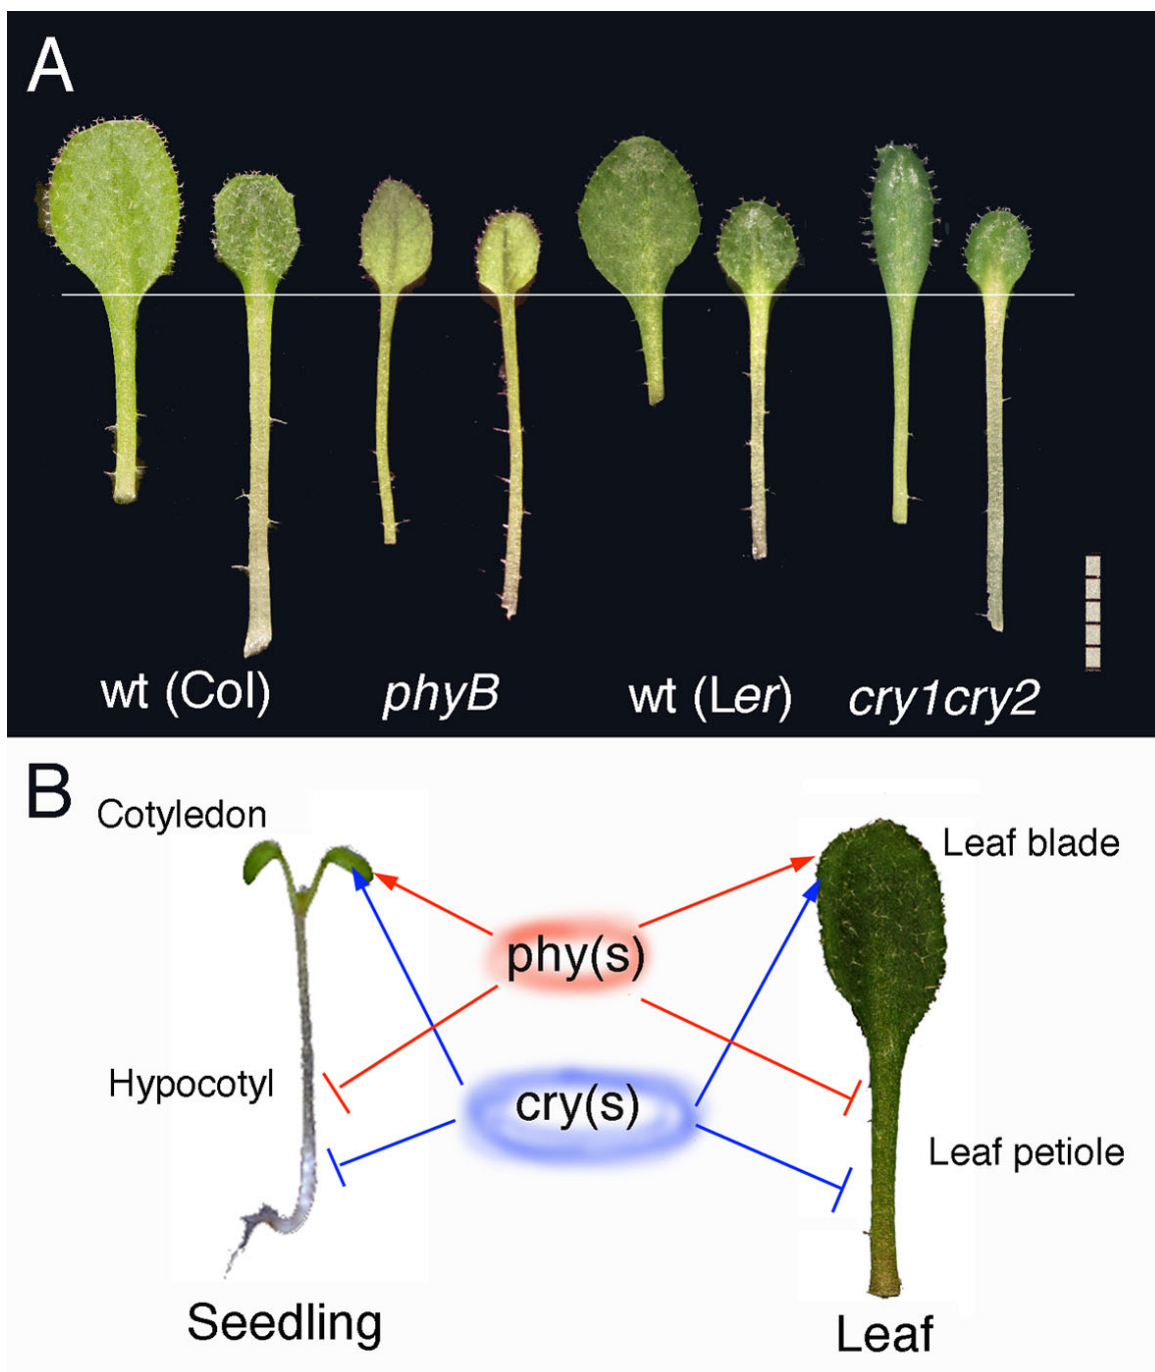

Fig. 1 Kim et al.

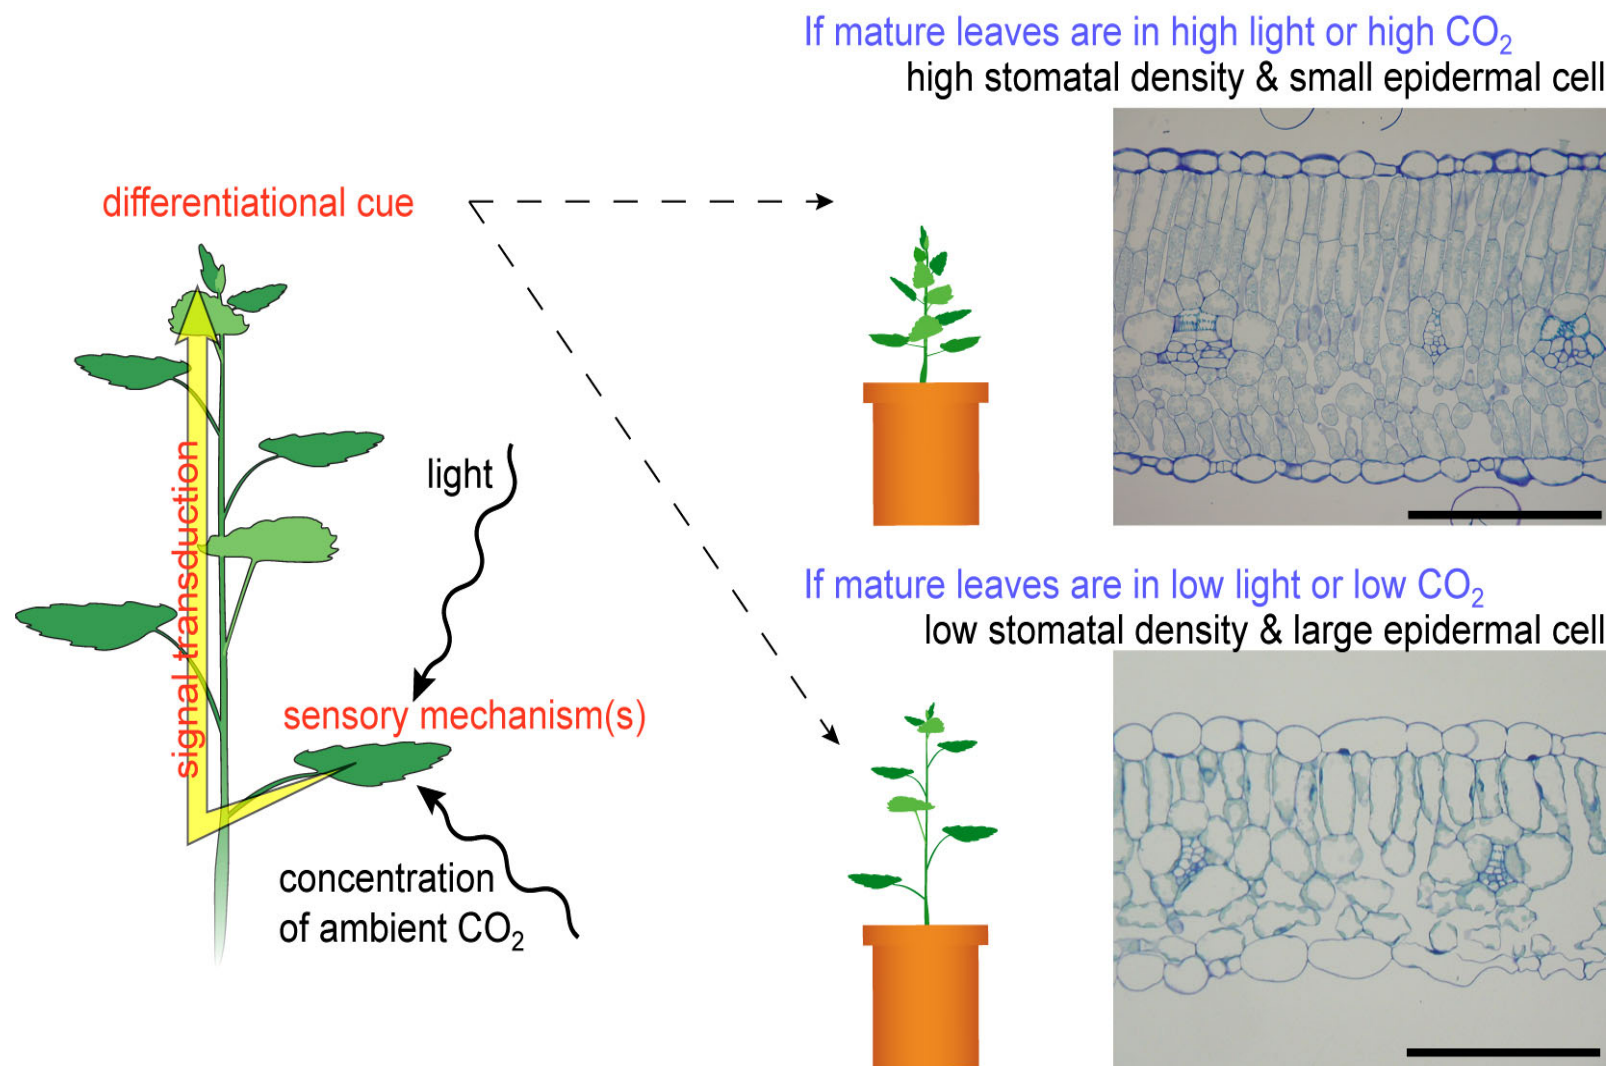

Fig. 2 Kim et al.

Supplement: b418440h.pdf [file b418440h.pdf]
